# Supplementary material for: Relaxing restrictions at the pace of vaccination increases freedom and guards against further COVID-19 waves
Source: PubMed Central journal article supplement (PMC8412259; doi:10.1371/journal.pcbi.1009288), 2021-09-02
Supplement: pcbi.1009288.s018.pdf [file pcbi.1009288.s018.pdf]

## S1 Eigenvalues of the homogeneous contact matrix

Here we will demonstrate a general case for the eigenvalues of a homogeneous contact matrix, for which every column accounts for the fraction age-groups represent respect to the total population.

**Theorem S1.1.** *Let  $C$  be a square  $n \times n$  matrix, such that all columns are identical, i.e.,  $C_{i,\bullet} = f_i$ ,  $f \in \mathbb{R}^n$ , and  $\sum_i f_i \neq 0$ . Then  $C$  is diagonalizable and has a single non-zero eigenvalue  $\lambda = \sum_i f_i$ .*

*Proof.* First, we note that the dimension of the kernel of  $T : \mathbb{R}^n \rightarrow \mathbb{R}^n$ ,  $T(u) = Cu$ , i.e, the vector space  $\ker(T) = \{u | Cu = 0\}$  is  $n - 1$ . Thus, there are  $n - 1$  linearly independent vectors associated to the eigenvalue  $\lambda = 0$ , which algebraic multiplicity has therefore to be equal or larger than  $n - 1$ . Then, we study the nature of the characteristic polynomial:

$$p(\lambda) = \det(C - \lambda I) \quad (1)$$

$$= \begin{vmatrix} f_1 - \lambda & f_1 & \dots & f_1 \\ f_2 & f_2 - \lambda & \dots & f_2 \\ \vdots & \vdots & \ddots & \vdots \\ f_n & f_n & \dots & f_n - \lambda \end{vmatrix} \quad (2)$$

$$\xrightarrow{\text{column } j - \text{column } 1, \forall j > 1} = \begin{vmatrix} f_1 - \lambda & \lambda & \lambda & \dots & \lambda \\ f_2 & -\lambda & 0 & \dots & 0 \\ f_3 & 0 & -\lambda & \dots & 0 \\ \vdots & \vdots & \vdots & \ddots & \vdots \\ f_n & 0 & 0 & \dots & -\lambda \end{vmatrix} \quad (3)$$

$$\xrightarrow{\text{row } 1 + \text{row } j, \forall j > 1} = \begin{vmatrix} \sum_i f_i - \lambda & 0 & 0 & 0 & 0 \\ f_2 & -\lambda & 0 & \dots & 0 \\ f_3 & 0 & -\lambda & \dots & 0 \\ \vdots & \vdots & \vdots & \ddots & \vdots \\ f_n & 0 & 0 & \dots & -\lambda \end{vmatrix} \quad (4)$$

The highlighted zone in the determinant corresponds to  $-\lambda I_{n-1}$ , with  $I_{n-1}$  the identity matrix in  $\mathbb{R}^{n-1 \times n-1}$ . Let  $\tilde{I}_{n-1}^j$  be  $I_{n-1}$ , but with the  $j$ 'th row replaced by a row of zeros. Using that  $|aA| = a^n |A|$  for an  $n \times n$  arbitrary matrix, and that  $|D| = \prod d_{ii}$  for a diagonal matrix, we calculate  $p(\lambda)$  by minor determinants:

$$p(\lambda) = \left( \sum_i f_i - \lambda \right) |-\lambda I_{n-1}| + \sum_{i=2}^n (-1)^{i-1} f_i |\tilde{I}_{n-1}^i| \quad (5)$$

$$= \left( \sum_i f_i - \lambda \right) (-1)^{n-1} \lambda^{n-1}. \quad (6)$$

As we found the last eigenvalue, and, by definition, it has at least one eigenvector, we completed the required set of  $n$  eigenvectors and concluded the demonstration.  $\square$

**Corollary S1.1.1.** *When  $C$  is a contact matrix as defined in theorem S1.1 and  $f$  accounts for the fraction age-groups represent respect to the total population, the largest eigenvalue of matrix  $C$  is 1.*

*Proof.* Direct from theorem S1.1, knowing that  $\sum_i f_i = 1$ .  $\square$
